# Supplementary material for: A Japanese family with cone-rod dystrophy of delayed onset caused by a compound heterozygous combination of novel CDHR1 frameshift and known missense variants
Source: PubMed Central journal article supplement (PMC6459921; doi:10.1038/s41439-019-0048-8), 2019-04-12
Supplement: 41439_2019_48_MOESM1_ESM.pdf [file 41439_2019_48_MOESM1_ESM.pdf]

**Supplementary Table S1: The steps used to filter for autosomal recessive variants in this study.**

| <b>Filtering criteria</b>                                                 | <b>Proband/ II-2</b> | <b>Elder brother/ II-1</b> |
|---------------------------------------------------------------------------|----------------------|----------------------------|
| Homozygous or heterozygous variants in affected individuals <sup>a</sup>  | 24162                | 24251                      |
| 193 autosomal recessive genes listed in the RetNet database <sup>b</sup>  | 388                  | 370                        |
| Allele frequency of $\leq 0.005$ in the public SNP databases <sup>c</sup> | 7                    | 4                          |
| Two or more variants in one gene                                          | 2 ( <i>CDHR1</i> )   | 2 ( <i>CDHR1</i> )         |

<sup>a</sup>The variants localized in the coding exonic regions and in the intronic regions within 5 bp of the exon-flanking boundaries ( $\pm 5$  bp) were included.

<sup>b</sup>The reported 193 genes responsible for autosomal recessive inherited retinal dystrophy (accessed 8th October 2017 (<https://sph.uth.edu/retnet/>)).

<sup>c</sup>The following databases were used: 1000 Genomes database (<http://www.1000genomes.org/>), Exome Aggregation Consortium database (<http://exac.broadinstitute.org/>), Human Genetic Variation Database (HGVD) (<http://www.genome.med.kyoto-u.ac.jp/SnpDB/>), and Tohoku Medical Megabank Organization database (ToMMo) (<https://ijgvd.megabank.tohoku.ac.jp/>).
