# Supplementary material for: A Japanese family with cone-rod dystrophy of delayed onset caused by a compound heterozygous combination of novel CDHR1 frameshift and known missense variants
Source: PubMed Central journal article supplement (PMC6459921; doi:10.1038/s41439-019-0048-8), 2019-04-12
Supplement: 41439_2019_48_MOESM2_ESM.pdf [file 41439_2019_48_MOESM2_ESM.pdf]

**Supplementary Table S2: The combination of variant types of *CDHR1* in CRD patients.**

| <b>Genotype-disease analysis in CRD</b> |                        |                   |
|-----------------------------------------|------------------------|-------------------|
|                                         | <b>Patient numbers</b> | <b>Percentage</b> |
| <b>LLP/LLP</b>                          | 22                     | 84.6%             |
| <b>LLP/Mis</b>                          | 4                      | 15.4%             |
| <b>Mis/Mis</b>                          | 0                      | 0%                |

The variant types of *CDHR1* in CRD patients described in the literature<sup>12-18</sup> were analyzed for type (LLP or Missense). The siblings analyzed in this study were also included. See the text for the definition of LLP. LLP/LLP means homozygous or compound heterozygous of LLP, and LLP/Mis means compound heterozygous of LLP and a missense variant.

CRD: Cone-rod dystrophy  
LLP: Large-scale loss of protein  
Mis: Missense
