# Supplementary material for: A Japanese family with cone-rod dystrophy of delayed onset caused by a compound heterozygous combination of novel CDHR1 frameshift and known missense variants
Source: PubMed Central journal article supplement (PMC6459921; doi:10.1038/s41439-019-0048-8), 2019-04-12
Supplement: 41439_2019_48_MOESM3_ESM.pdf [file 41439_2019_48_MOESM3_ESM.pdf]

**Supplementary Table S3: The symptom information of 26 cases of CRD and the judgement of severity.**

| Patient number | Patient ID                             | Sex | Clinical diagnosis           | Genotype                                            |                                            | Onset age    | Age at Examination | BCVA (as logMAR)                   | Color vision                            | ERG                                                                                                                          | Visual field                                                                                                                                                                                                             | Fundus                                                                                                                                                                                                             | FFA                                                                                                             | OCT                                                                                                                                      | Reference  |
|----------------|----------------------------------------|-----|------------------------------|-----------------------------------------------------|--------------------------------------------|--------------|--------------------|------------------------------------|-----------------------------------------|------------------------------------------------------------------------------------------------------------------------------|--------------------------------------------------------------------------------------------------------------------------------------------------------------------------------------------------------------------------|--------------------------------------------------------------------------------------------------------------------------------------------------------------------------------------------------------------------|-----------------------------------------------------------------------------------------------------------------|------------------------------------------------------------------------------------------------------------------------------------------|------------|
|                |                                        |     |                              | Nucleotide change                                   | Protein change                             |              |                    |                                    |                                         |                                                                                                                              |                                                                                                                                                                                                                          |                                                                                                                                                                                                                    |                                                                                                                 |                                                                                                                                          |            |
| 1              | II-2/Proband/<br>Japanese family       | F   | CRD                          | Heterozygous<br>c.1106dup<br>c.2027T>A              | p.H370Afs*17<br>p.I676N                    | 30           | 41                 | OD: -0.10<br>OS: -0.20<br>OU: Mild | Can pass Ishihara test<br>Mild          | Generalized cone-rod pattern of dysfunction<br>Moderate                                                                      | —                                                                                                                                                                                                                        | —                                                                                                                                                                                                                  | —                                                                                                               | —                                                                                                                                        | This study |
|                |                                        |     |                              |                                                     |                                            | Mild         | 59                 | OU: 1.52                           | Severely impaired                       | Non-recordable under both scotopic and photopic conditions                                                                   | Larger central scotoma                                                                                                                                                                                                   | Macular atrophy with additional diffuse retinal degeneration                                                                                                                                                       | Hypo-autofluorescence in the macular area along with arcade vessels. More area involved.                        | Apparent thinning of the retina and disruption of the ellipsoid zone.                                                                    |            |
| 2              | II-1/Elder brother/<br>Japanese family | M   | CRD                          | Heterozygous<br>c.1106dup<br>c.2027T>A              | p.H370Afs*17<br>p.I676N                    | 30           | 54                 | OU: 0.00<br>OU: Mild               | Some color vision preserved<br>Moderate | Generalized cone-rod pattern of dysfunction<br>Moderate                                                                      | —                                                                                                                                                                                                                        | —                                                                                                                                                                                                                  | —                                                                                                               | —                                                                                                                                        | This study |
|                |                                        |     |                              |                                                     |                                            | Mild         | 62                 | OD: 0.2<br>OS: 1.00                | Severely impaired                       | ERGs reduced but detectable scotopic responses                                                                               | Central scotoma                                                                                                                                                                                                          | Macular atrophy                                                                                                                                                                                                    | Hypo-autofluorescence in the macular area along with arcade vessels                                             | Apparent thinning of the retina and disruption of the ellipsoid zone; RPE was relatively preserved around the parafoveal area.           |            |
| 3              | IV-2/Family 1                          | F   | Retinal degeneration         | Homozygous<br>c.338delG                             | p.G113AfsX1                                | Late teenage | 44                 | OU: 2.28                           | Severe color vision defect              | ERG showed both cone and rod responses.                                                                                      | Not available                                                                                                                                                                                                            | Vessel attenuation, diffuse RPE changes, and dense bone spicule pigment migration in the retinal periphery and atrophy both at the macula and in the periphery                                                     | Not available                                                                                                   | Not available                                                                                                                            | [12]       |
| 4              | IV-4/Family 1                          | M   | Retinal degeneration         | Homozygous<br>c.338delG                             | p.G113AfsX1                                | Late teenage | 40                 | OU: 2.28                           | Severe color vision defect              | ERG showed both cone and rod responses.                                                                                      | Not available                                                                                                                                                                                                            | Vessel attenuation, diffuse RPE changes, and dense bone spicule pigment migration in the retinal periphery and atrophy both at the macula and in the periphery                                                     | Not available                                                                                                   | Not available                                                                                                                            | [12]       |
| 5              | IV-5/Family 1                          | F   | Retinal degeneration         | Homozygous<br>c.338delG                             | p.G113AfsX1                                | Late teenage | 40                 | OU: 2.28                           | Severe color vision defect              | ERG showed both cone and rod responses.                                                                                      | Not available                                                                                                                                                                                                            | Vessel attenuation, diffuse RPE changes, and dense bone spicule pigment migration in the retinal periphery and atrophy both at the macula and in the periphery                                                     | Not available                                                                                                   | Not available                                                                                                                            | [12]       |
| 6              | IV-6/Family 1                          | M   | Retinal degeneration         | Homozygous<br>c.338delG                             | p.G113AfsX1                                | Late teenage | 40                 | OU: 2.28                           | Severe color vision defect              | Cone-rod pattern of disease                                                                                                  | Not available                                                                                                                                                                                                            | Vessel attenuation, diffuse RPE changes, and dense bone spicule pigment migration in the retinal periphery and atrophy both at the macula and in the periphery                                                     | Not available                                                                                                   | Not available                                                                                                                            | [12]       |
| 7              | II-1/Family 2                          | M   | Retinal degeneration         | Homozygous<br>c.1463delG                            | p.G488AfsX20                               | 18           | 46                 | OU: 2.28                           | No color vision                         | Detectable rod or cone responses in either eye                                                                               | V4e isopter in green and III4e in red; there are peripheral islands of residual vision and no response centrally to the largest and brightest target (V4e) in the right eye and small areas of response in the left eye. | Circular patches of pigment epithelial atrophy both at the macula and in the periphery associated with pigment migration and vessel attenuation                                                                    | Not available                                                                                                   | Not available                                                                                                                            | [12]       |
| 8              | II-4/Faroe Islands CRD fam.            | M   | CRD                          | Homozygous<br>c.524dupA                             | p.Q175QfsX47                               | 17           | 29                 | OD: 0.17<br>OS: 1.7                | Not available                           | Undetectable                                                                                                                 | Only narrow peripheral remnants left in the lower visual fields and a paracentral preserved island of 10°                                                                                                                | Diffuse atrophy of RPE; extensive sheen in the macular region; numerous, polymorphic, intraretinal hyperpigmentations in the upper temporal midperiphery.                                                          | Not available                                                                                                   | Not available                                                                                                                            | [13]       |
| 9              | II-6/Faroe Islands CRD fam.            | F   | CRD                          | Homozygous<br>c.524dupA                             | p.Q175QfsX47                               | 17           | 36                 | OU: 1.00                           | Severely impaired                       | Markedly delayed and reduced rod and cone responses                                                                          | Normal or slightly constricted outer field limits. A central scotoma measuring 5° was found.                                                                                                                             | Irregular foveal degeneration and normal arteriolar caliber                                                                                                                                                        | Not available                                                                                                   | Not available                                                                                                                            | [13]       |
| 10             | II-10/Faroe Islands CRD fam.           | M   | CRD                          | Homozygous<br>c.524dupA                             | p.Q175QfsX47                               | 17           | 37                 | OD: 0.22<br>OS: 1.00               | Severely impaired                       | Markedly delayed and reduced rod and cone responses                                                                          | Normal or slightly constricted outer field limits.                                                                                                                                                                       | Irregular RPE atrophy in the macular region, attenuated arterioles and paleness of the optic nerve head                                                                                                            | Not available                                                                                                   | Not available                                                                                                                            | [13]       |
| 11             | IV-2/Faroe Islands CRD fam.            | M   | CRD                          | Homozygous<br>c.524dupA                             | p.Q175QfsX47                               | 15           | 17                 | OD: 0.8<br>OS: 0.17                | Not available                           | Undetectable                                                                                                                 | Not available                                                                                                                                                                                                            | Foveal atrophy and attenuated arterioles                                                                                                                                                                           | Not available                                                                                                   | Not available                                                                                                                            | [13]       |
| 12             | IV-2/TB-127                            | F   | CRD                          | Homozygous<br>c.1485+2T>G                           | Elimination of intron 13 donor splice site | 20           | 36                 | OU: 1.3                            | No color vision                         | Cone responses absent, and reduced rod responses                                                                             | Bilateral deep large central scotomas with significant general reduction of sensitivity in both eyes                                                                                                                     | Pigmentary deposits localized mainly in the peripheral retina, a thinned and atrophic macular region, retinal vessel attenuation.                                                                                  | Not available                                                                                                   | Severe thinning of the macula, with irregular RPE                                                                                        | [14]       |
| 13             | IV-3/TB-127                            | F   | CRD                          | Homozygous<br>c.1485+2T>G                           | Elimination of intron 13 donor splice site | 20           | 38                 | OU: 1.3                            | No color vision                         | Cone responses absent, and reduced rod responses                                                                             | Bilateral deep large central scotomas with significant general reduction of sensitivity in both eyes                                                                                                                     | Pigmentary deposits localized mainly in the peripheral retina, a thinned and atrophic macular region, retinal vessel attenuation.                                                                                  | Not available                                                                                                   | Macular thinning and loss of foveal contour                                                                                              | [14]       |
| 14             | IV-1/Palestinian family                | F   | Retinal degeneration         | Homozygous<br>c.1381C>T                             | p.Q461X                                    | Childhood    | 45                 | OD: 1.7<br>OS: 1.6                 | Some color vision preserved             | Rod and cone responses were severely reduced                                                                                 | Peripheral islands of vision temporally and inferiorly with central vision loss                                                                                                                                          | Bull's eye pattern of RPE atrophy in the macula and circular patches of RPE atrophy anterior to the arcades, with retinal vascular attenuation and bone spicule pigmentation.                                      | Not available                                                                                                   | Thinning and loss of the outer nuclear, IS, and OS layers.                                                                               | [15]       |
| 15             | IV-3/Palestinian family                | F   | Retinal degeneration         | Homozygous<br>c.1381C>T                             | p.Q461X                                    | Childhood    | 36                 | OD: 0.9<br>OS: 0.7                 | No color vision                         | Rod and cone responses were severely reduced                                                                                 | Severe field constriction with small central island                                                                                                                                                                      | Bull's eye pattern of RPE atrophy in the macula and circular patches of RPE atrophy anterior to the arcades, with retinal vascular attenuation and bone spicule pigmentation.                                      | Not available                                                                                                   | Thinning and loss of the outer nuclear, IS, and OS layers. The outer retinal layers were relatively preserved around the anatomic fovea. | [15]       |
| 16             | IV-4/Palestinian family                | F   | Retinal degeneration         | Homozygous<br>c.1381C>T                             | p.Q461X                                    | Childhood    | 32                 | OD: 0.3<br>OS: 0.7                 | Some color vision preserved             | Rod and cone responses were severely reduced                                                                                 | Severe field constriction with small central island                                                                                                                                                                      | Bull's eye pattern of RPE atrophy in the macula and circular patches of RPE atrophy anterior to the arcades, with retinal vascular attenuation and bone spicule pigmentation.                                      | Not available                                                                                                   | Thinning and loss of the outer nuclear, IS, and OS layers. The outer retinal layers were relatively preserved around the anatomic fovea. | [15]       |
| 17             | II-2/GC18832                           | F   | CRD                          | Homozygous<br>c.1463delG                            | p.G488fs                                   | 18           | 24                 | OU: 0.48                           | Some color vision preserved             | Undetectable PERG; Scotopic bright flash ERG is markedly delayed and subnormal; Severely delayed and reduced cone responses. | OU: Relatively large central scotoma; OS: smaller paracentral islands of sensitivity loss.                                                                                                                               | RPE changes at the macula; normally appearing peripheral retina                                                                                                                                                    | Speckled hypo-autofluorescence in the macular region.                                                           | Disruption of the photoreceptor and RPE layers at the fovea                                                                              | [16]       |
| 18             | II-3/GC18832                           | M   | CRD                          | Homozygous<br>c.1463delG                            | p.G488fs                                   | 15           | 18                 | OU: 0.48                           | Severely impaired                       | Undetectable PERG; Scotopic bright flash ERG is markedly delayed and subnormal; Severely delayed and reduced cone responses. | OU: Normal Fields                                                                                                                                                                                                        | Subtle RPE atrophic changes at the center of both maculae                                                                                                                                                          | Normal fundus autofluorescence                                                                                  | Not available                                                                                                                            | [16]       |
| 19             | II-6/GC18832                           | F   | CRD                          | Homozygous<br>c.1463delG                            | p.G488fs                                   | 15 1/2       | 16                 | OU: 0.3                            | Only demo Ishihara plate in both eyes   | PERG: severely reduced; Scotopic bright flash ERG is moderately subnormal; Severely delayed & reduced cone responses.        | OD: a left central and paracentral relative scotomata to static stimuli. OS: A small relative scotoma.                                                                                                                   | Elevated, pigmented macular lesion; normally appearing peripheral retina                                                                                                                                           | A ring of hyper-autofluorescence surrounding a central bull's eye lesion.                                       | A localized dome-shaped foveal elevation in both eyes involving the RPE layer, which also had an uneven reflectivity                     | [16]       |
| 20             | 1/Family A                             | M   | CRD                          | Homozygous<br>c.2522_2528 delTCTCTGA                | p.I841Sfs*119                              | 9            | 39                 | OU: 1.81                           | Severely impaired                       | Rod & cone responses nearly extinguished                                                                                     | Larger central visual field defect                                                                                                                                                                                       | Macular atrophy, pigment loss, tigroid appearance, optic nerve disc pallor, retinal vessel attenuation.                                                                                                            | Hypo-autofluorescence in the macular area along with arcade vessels. More area involved.                        | Disturbance in cone outer segments and RPE layer was intense.                                                                            | [17]       |
| 21             | 2/Family A                             | M   | CRD                          | Homozygous<br>c.2522_2528 delTCTCTGA                | p.I841Sfs*119                              | 14           | 37                 | OD: 2.28<br>OS: 1.98               | Severely impaired                       | Rod & cone responses extinguished                                                                                            | Not measurable                                                                                                                                                                                                           | Macular atrophy, pigment loss, optic nerve disc pallor, retinal vessel attenuation.                                                                                                                                | Hypo-autofluorescence in the macular area along with arcade vessels. More area involved.                        | Disturbance in cone outer segments and RPE layer was intense.                                                                            | [17]       |
| 22             | 3/Family A                             | M   | CRD                          | Homozygous<br>c.2522_2528 delTCTCTGA                | p.I841Sfs*119                              | 12           | 31                 | OU: 2.28                           | Severely impaired                       | Rod & cone responses extinguished                                                                                            | Not measurable                                                                                                                                                                                                           | Macular atrophy, pigment loss, optic nerve disc pallor, retinal vessel attenuation.                                                                                                                                | Not available                                                                                                   | Disturbance in cone outer segments and RPE layer was intense.                                                                            | [17]       |
| 23             | 4/Family A                             | F   | CRD                          | Homozygous<br>c.2522_2528 delTCTCTGA                | p.I841Sfs*119                              | 14           | 35                 | OU: 2.28                           | Severely impaired                       | Rod & cone responses extinguished                                                                                            | Not measurable                                                                                                                                                                                                           | Macular atrophy, pigment loss, tigroid appearance, optic nerve disc pallor, retinal vessel attenuation.                                                                                                            | Hypo-autofluorescence in the macular area along with arcade vessels. More area involved.                        | Disturbance in cone outer segments and RPE layer was intense.                                                                            | [17]       |
| 24             | 1/Family B                             | M   | CRD                          | Heterozygous<br>c.1448A>G<br>c.2522_2528 delTCTCTGA | p.E483G<br>p.I841Sfs*119                   | Childhood    | 33                 | OD: 0.4<br>OS: 0.6                 | Color vision defect present             | Rod & cone responses extinguished                                                                                            | Central scotoma                                                                                                                                                                                                          | Geographic atrophy of the macula, pigment loss, tigroid appearance, retinal vessel attenuation.                                                                                                                    | Not available                                                                                                   | Mild disturbance in cone outer segments and RPE layer.                                                                                   | [17]       |
| 25             | 2/Family B                             | F   | CRD                          | Heterozygous<br>c.1448A>G<br>c.2522_2528 delTCTCTGA | p.E483G<br>p.I841Sfs*119                   | Teenage      | 25                 | OD: 0.54<br>OS: 0.6                | Color vision defect present             | Rod and cone ERG not detectable; Mixed cone-rod ERG reduced.                                                                 | Relatively smaller central scotoma                                                                                                                                                                                       | Changes of the retinal pigment epithelium in the macula, optic nerve disc pallor, no pigmentary changes in the periphery, retinal vessel attenuation.                                                              | Not available                                                                                                   | Mild disturbance in cone outer segments and RPE layer.                                                                                   | [17]       |
| 26             | II-4/M341                              | F   | Retinal dystrophy/<br>MD/CRD | Homozygous<br>c.T1641A                              | p.Y547*                                    | 24           | 45                 | Markly reduced                     | Severely impaired                       | Markedly reduced rod and cone responses                                                                                      | Not available                                                                                                                                                                                                            | Attenuated vessels, absence of the foveal reflex, punctated salt- and pepper-like appearance, circular patches of RPE atrophy both at the macula and in the periphery with associated peripheral pigment migration | A hyper-autofluorescent ring surrounding a central area of hypo-autofluorescence and an atrophic macular region | Not available                                                                                                                            | [18]       |

The information of 8 symptoms (onset age, BCVA, ERG, color vision, visual field, OCT, fundus photograph, and FFA) for each patient described in the literature<sup>12-18</sup> and the siblings analyzed in this study were extracted. The judgment of severity was performed as follows:

**Onset age:** 21 – 30 years (or greater) (mild), 11 – 20 years (moderate), 0 – 10 years (severe);

**BCVA (as logMAR):** 0.2 – 0.48 (mild), 0.49 – 0.9 (moderate), 0.91 – or greater (severe);

**Color vision defect:** Can pass more than 10 Ishihara plates (mild), can pass less than 10 Ishihara plates (moderate), cannot read a demo plate (severe);

**ERG:** Both cone and rod ERG present and slightly reduced (mild); Either cone or rod ERG undetectable and the other one reduced but detectable (moderate); Both cone and rod responses undetectable/severely reduced (severe);

**Fundus:** Changes of RPE at the macula, vessel attenuation and less pigmentary change in the periphery (mild), early macular atrophy and sparse bone spicule pigment (moderate), obvious macular atrophy and dense bone spicule pigment (severe);

**Visual field:** Normal field or small paracentral scotoma/slightly constricted outer field (mild); medium central scotoma/constricted outer field (moderate); large central scotoma/severe field constriction (severe);

**FAF:** Normal fundus autofluorescence and slight hypo-autofluorescence in the macular area (mild), hypo-autofluorescence in the macular area along with arcade vessels (moderate), larger area with hypo-autofluorescence in the macular area and arcade vessels (severe);

**OCT:** The RPE was relatively preserved around the parafoveal area (mild), the apparent thinning of the retina and disruption of the ellipsoid zone (moderate), the macular thinning and loss of foveal contour (severe).

**Abbreviations:** CRD, cone-rod dystrophy; BCVA, best-corrected visual acuity; OD, oculus dexter (right eye); OS, oculus sinister (left eye); OU, oculus uterque (both eyes); ERG, electroretinogram; PERG, pattern electroretinogram; RPE, retinal pigment epithelium; FFA, fundus autofluorescence; OCT, optical coherence tomography; IS, inner segment; OS, outer segment.
