# Supplementary material for: A Japanese family with cone-rod dystrophy of delayed onset caused by a compound heterozygous combination of novel CDHR1 frameshift and known missense variants
Source: PubMed Central journal article supplement (PMC6459921; doi:10.1038/s41439-019-0048-8), 2019-04-12
Supplement: 41439_2019_48_MOESM6_ESM.pdf [file 41439_2019_48_MOESM6_ESM.pdf]

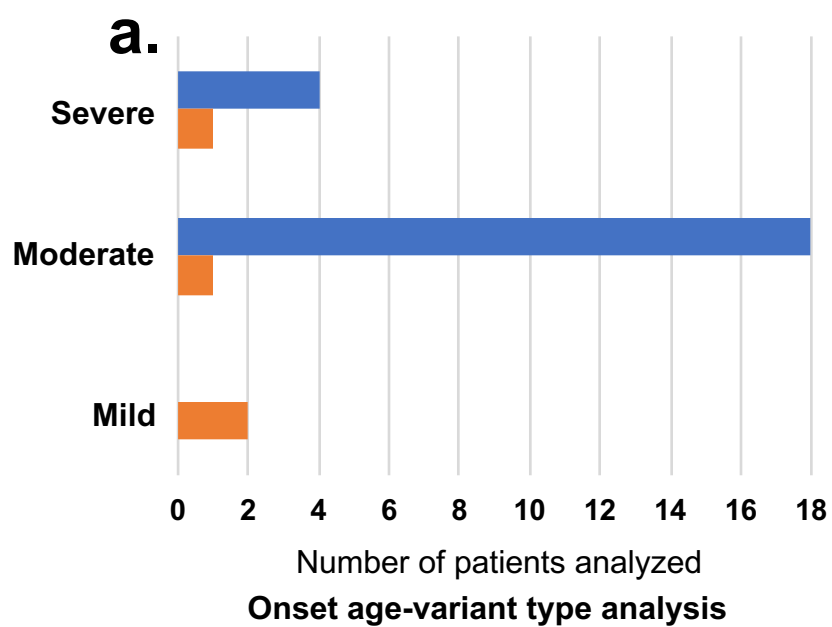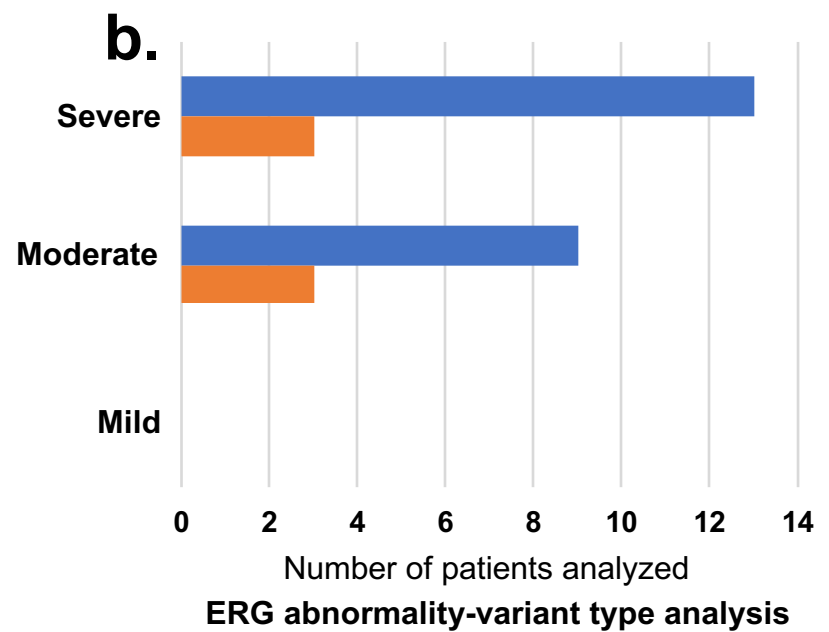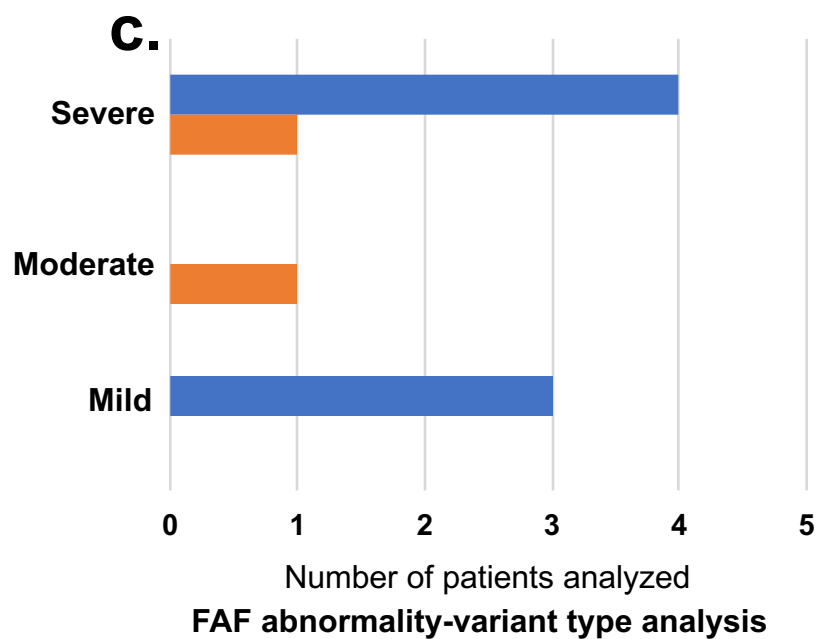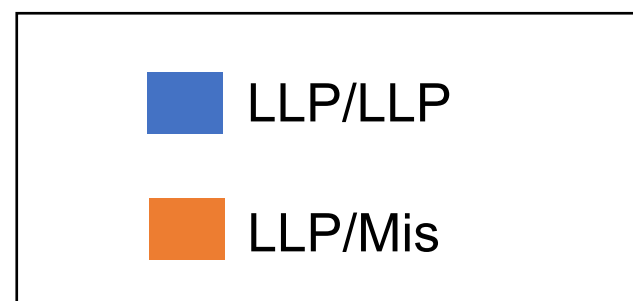

LLP: Large-scale loss of protein  
Mis: Missense

**Supplementary figure S2(ii): The correlation between each of the clinical symptoms and the variant types.**

The judged severity of each of the clinical symptoms of the CRD patients extracted from the literature (Supplementary Table S3) was analyzed for the correlation with the combination of variant type (LLP/LLP or LLP/Mis).

(ii) At the onset age (a), ERG (b), and FAF (c), there was no correlation with the variant type.
